# Supplementary material for: A flexible rechargeable zinc-ion wire-shaped battery with shape memory function
Source: Royal Society of Chemistry journal article supplement (doi:10.1039/c8ta01172a), 2018-01-01
Supplement: c8ta01172a3.pdf [file c8ta01172a3.pdf]

## **Supporting Information**

### **A Flexible Rechargeable Zinc-Ion Wire-shaped Battery with Shape Memory Function**

Zifeng Wang,<sup>a</sup> Zhaoheng Ruan,<sup>a</sup> Zhuoxin Liu,<sup>a</sup> Yukun Wang,<sup>a</sup> Zijie Tang,<sup>a</sup> Hongfei Li,<sup>a</sup>

Minshen Zhu,<sup>a</sup> Tak Fuk Hung,<sup>a</sup> Jun Liu,<sup>b</sup> Zicong Shi,<sup>b</sup> and Chunyi Zhi<sup>a\*</sup>

a. Department of Materials Science and Engineering, City University of Hong Kong, 83 Tat

Chee Avenue, Kowloon, Hong Kong Special Administrative Region, China

b. School of Material and Energy, Guangdong University of Technology, Guangzhou,

510006, PR China

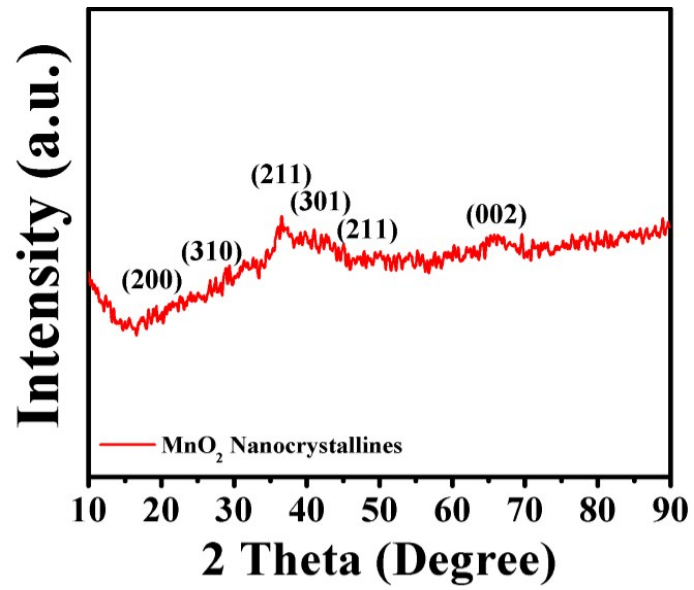

**Figure S1.** X-ray diffraction pattern of the electrodeposited MnO<sub>2</sub> nanocrystallines (PDF#44-0141).

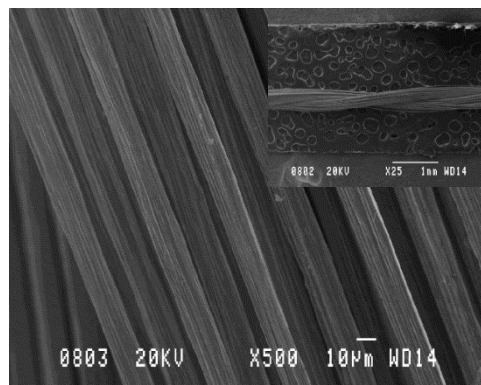

**Figure S2.** Typical SEM image of pristine stainless steel yarn. Inset figure shows the twisting shape of the yarn.

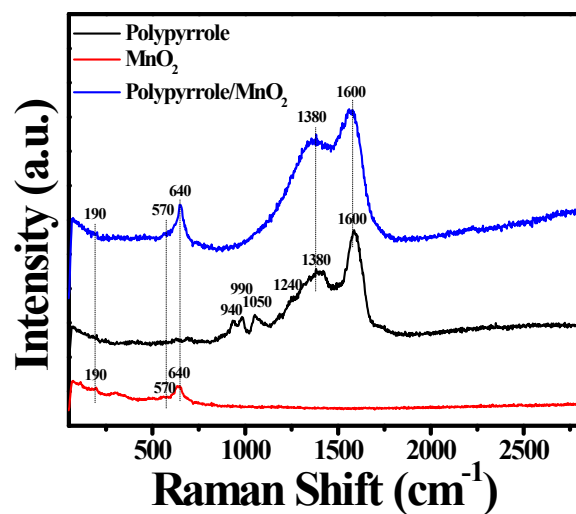

**Figure S3.** Raman spectra of electrodeposited Polypyrrole,  $\text{MnO}_2$  and Polypyrrole coated  $\text{MnO}_2$ .

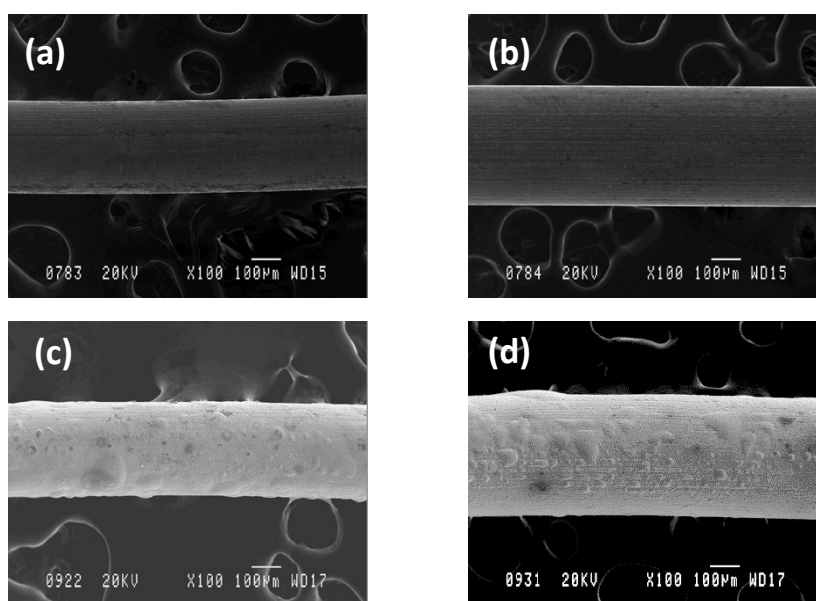

**Figure S4.** SEM images of pristine nitinol wires and Zn electrodeposited nitinol wires of different diameters. (a) and (b) SEM images of 0.012 inch and 0.016 inch nitinol wires, respectively; (c) and (d) Zn electrodeposited nitinol wires with diameters of 0.012 and 0.016 inch, respectively.

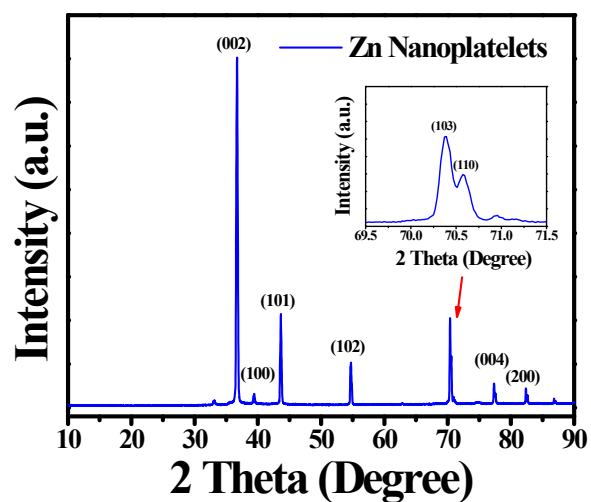

**Figure S5.** X-ray diffraction pattern of the electrodeposited Zn nanoplatelets (PDF#87-0713);

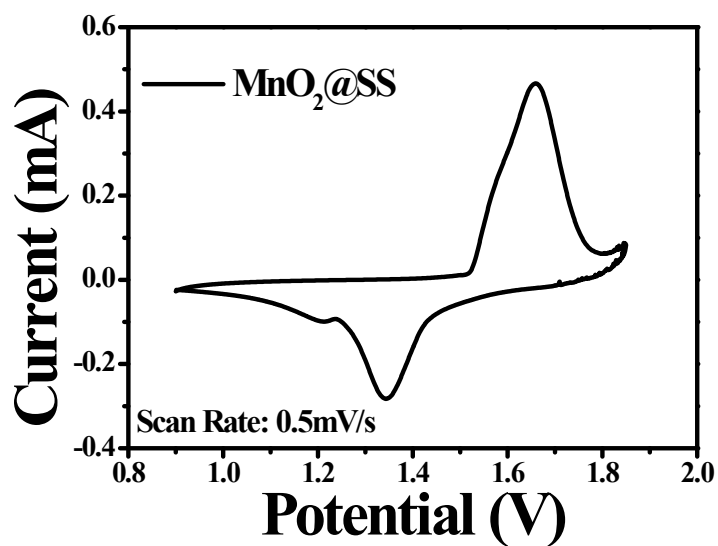

**Figure S6.** Cyclic voltammetry study of electrodeposited MnO<sub>2</sub> on stainless steel at 0.5mV/s scan rate.

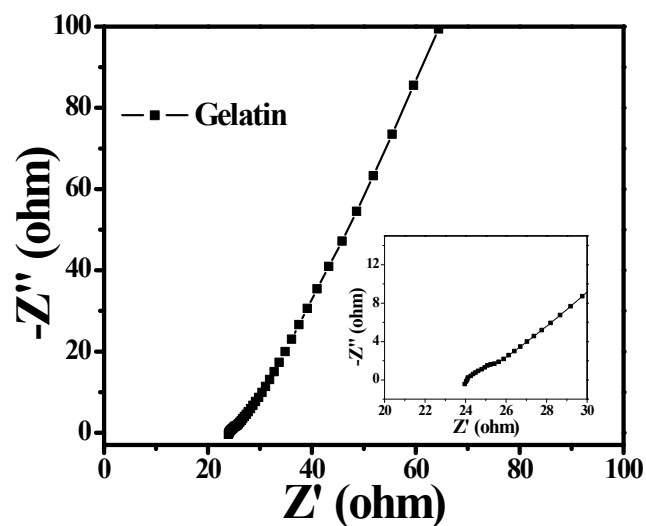

Figure S7. Electrochemical impedance study of gelatin electrolyte without the addition of borax.

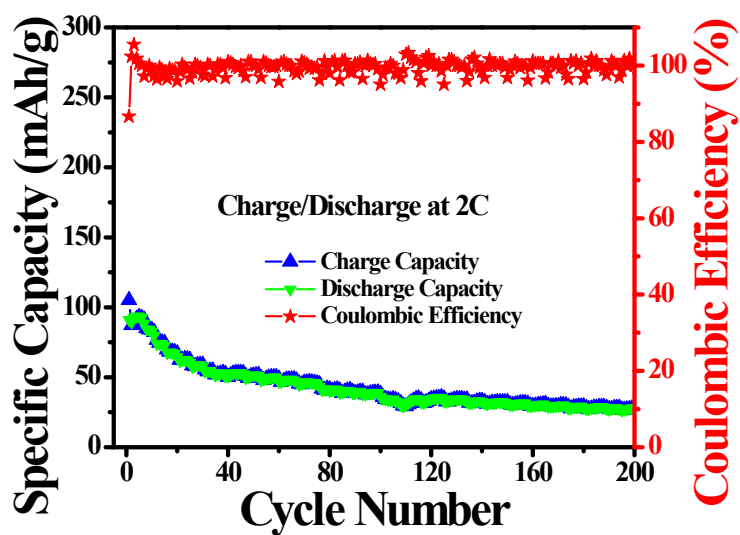

Figure S8. Cyclic stability of Zn@NT-MnO<sub>2</sub>@SS without PPy coating at 2 C current density.

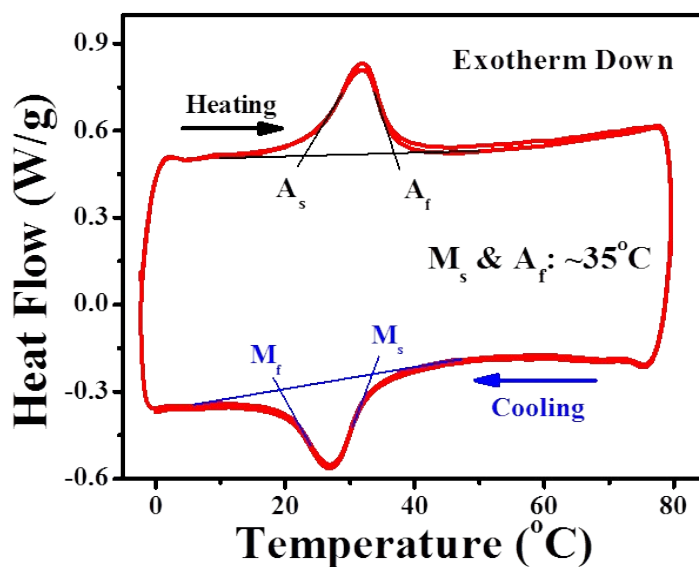

**Figure S9.** Differential scanning calorimetry study of pristine nitinol wire, showing the phase transition temperatures of the NiTi phase. The four markers, which are  $A_s$ ,  $A_f$ ,  $M_f$  and  $M_s$  on the curve represent the corresponding phase transition temperature determined by DSC analysis, in which  $A_s$  and  $A_f$  represent the starting and finishing temperatures of the austenitic transition whereas the  $M_s$  and  $M_f$  represent the corresponding temperatures of martensitic transition of the NiTi alloy.

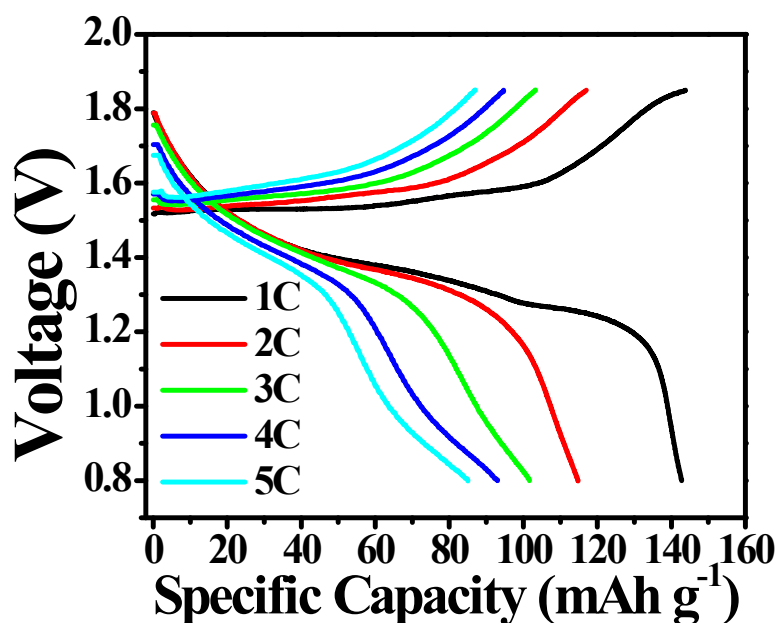

**Figure S10.** The charge/discharge curves of the Zn@NT-MnO<sub>2</sub>/PPy@SS battery in aqueous electrolyte at 1 to 5 C current densities, respectively.

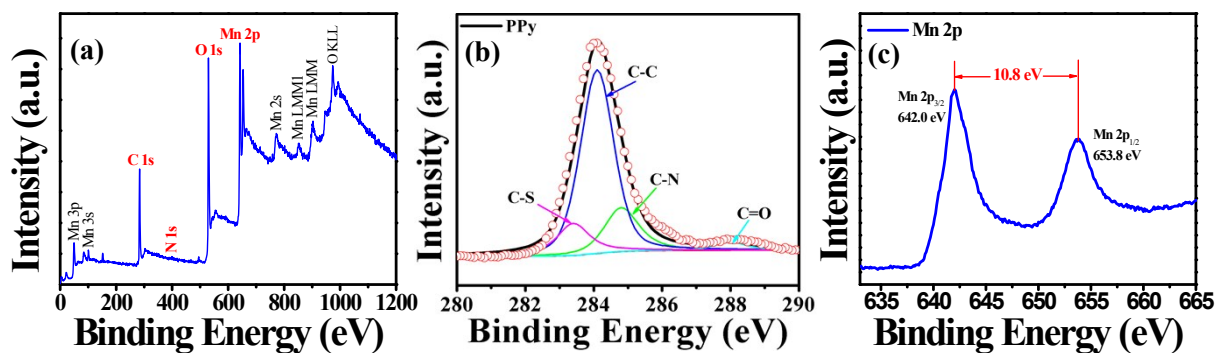

**Figure S11.** XPS spectra of MnO<sub>2</sub> coated with PPy. (a) XPS survey spectra reviewing the component elements of MnO<sub>2</sub> coated with PPy; (b) High resolution C 1s spectrum showing the characteristics of PPy and the corresponding bonds; (c) High resolution Mn 2p spectrum showing the characteristics of MnO<sub>2</sub>.

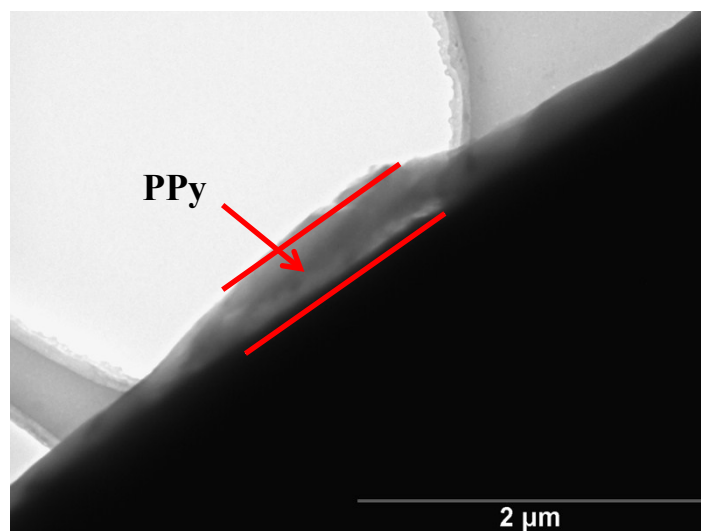

**Figure S12.** Typical TEM image of the MnO<sub>2</sub> electrode material coated with PPy, the different morphology indicates the existence of the electrodeposited PPy film.

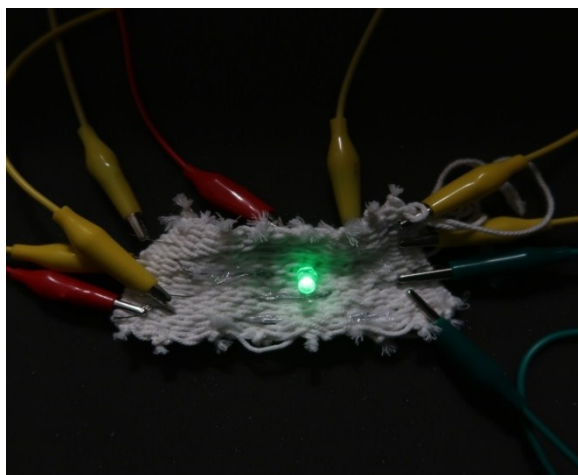

**Figure S13.** Picture showing the textile woven by cotton yarn and the SMWB and successfully powering of a green light LED bulb.
